# Supplementary material for: Effect of Fixation Methods on Biochemical Characteristics of Green Teas and Their Lipid-Lowering Effects in a Zebrafish Larvae Model
Source: MDPI journal article supplement (doi:10.3390/foods11111582), 2022-05-28
Supplement: s1 [file foods-1743699-supplementary.pdf › foods-1743699-supplementary.pdf]

## **Effect of Fixation Methods on Biochemical Characteristics of Green Teas and Their Lipid-Lowering Effects in a Zebrafish Larvae Model**

This file contains the following tables:

**Table S1. Volatile compounds in PGT and SGT.**

**Table S2. VIP values in OPLS-DA model and  $p$  values of volatiles compounds.**

**Table S3. Contents of chemical compounds in PGT and SGT.**

**Table S4. VIP values in OPLS-DA model and  $p$  values of chemical compounds.**

**Table S1. Volatile compounds in PGT and SGT.**

| ID        | Name                       | Retention Index | CAS        | Relative Content (%) |             |
|-----------|----------------------------|-----------------|------------|----------------------|-------------|
|           |                            |                 |            | PGT                  | SGT         |
| Alcohols  |                            |                 |            |                      |             |
| 1         | (Z)-3-Hexen-1-ol           | 868             | 928-96-1   | 1.86 ± 0.07          | 2.26 ± 0.48 |
| 2         | 1-Hexanol                  | 860             | 111-27-3   | -                    | 3.14 ± 0.12 |
| 3         | 5-Methyl-2-heptanol        | 915             | 54630-50-1 | -                    | 1.27 ± 0.17 |
| 4         | 1-Octen-3-ol               | 969             | 3391-86-4  | 0.83 ± 0.09          | 1.5 ± 0.1   |
| 5         | Benzyl alcohol             | 1036            | 100-51-6   | 1.26 ± 0.36          | -           |
| 6         | Myrcenol                   | 1064            | 543-39-5   | 1.32 ± 0.11          | -           |
| 7         | 1-Octanol                  | 1059            | 111-87-5   | 0.76 ± 0.1           | 1.16 ± 0.11 |
| 8         | (E)-Linalool oxide (furan) | 1164            | 34995-77-2 | 1.52 ± 0.22          | 0.62 ± 0.44 |
| 9         | Linalool                   | 1082            | 78-70-6    | 14.21 ± 0.86         | 23.7 ± 0.98 |
| 10        | Phenylethyl Alcohol        | 1136            | 60-12-8    | 1.7 ± 0.15           | 0.47 ± 0.33 |
| 11        | (S)-3,7-Dimethyl-1-octanol | 1130            | 68680-98-8 | 0.1 ± 0.01           | -           |
| 12        | (Z)-3-Nonen-1-ol           | 1167            | 10340-23-5 | 0.1 ± 0              | 0.09 ± 0.07 |
| 13        | 1-Nonanol                  | 1159            | 143-08-8   | -                    | 0.55 ± 0.06 |
| 14        | trans-2-Pinanol            | 1088            | 4948-29-2  | -                    | 1.93 ± 0.18 |
| 15        | (Z)-Nerol                  | 1228            | 106-25-2   | 0.17 ± 0.02          | 0.26 ± 0.03 |
| 16        | Geraniol                   | 1228            | 106-24-1   | 8.37 ± 1.02          | 4.93 ± 0.19 |
| 17        | Cedrenol                   | 1586            | 28231-03-0 | -                    | 2.85 ± 0.28 |
| Aldehydes |                            |                 |            |                      |             |
| 18        | Benzaldehyde               | 982             | 100-52-7   | 1.29 ± 0.28          | 1.58 ± 0.15 |
| 19        | Nonanal                    | 1104            | 124-19-6   | 1.25 ± 0.06          | 1.17 ± 0.39 |
| 20        | Decanal                    | 1204            | 112-31-2   | 0.55 ± 0.18          | 0.58 ± 0.08 |

|              |                                             |      |            |                 |                  |
|--------------|---------------------------------------------|------|------------|-----------------|------------------|
| 21           | $\beta$ -Cyclocitral                        | 1204 | 432-25-7   | $0.34 \pm 0.02$ | $0.48 \pm 0.05$  |
| 22           | 10-Undecenal                                | 1293 | 112-45-8   | $0.18 \pm 0.03$ | -                |
| Hydrocarbons |                                             |      |            |                 |                  |
| 23           | 1,3,5,7-Cyclooctatetraene                   | 888  | 629-20-9   | $6.53 \pm 1.87$ | $6.24 \pm 2.93$  |
| 24           | Myrcene                                     | 958  | 123-35-3   | $5.3 \pm 0.73$  | $3.13 \pm 2.22$  |
| 25           | 4-Methyl-3-(1-methylethylidene)-cyclohexene | 1023 | 99805-90-0 | $0.42 \pm 0.3$  | $0.46 \pm 0.12$  |
| 26           | o-Cymene                                    | 1042 | 527-84-4   | $0.44 \pm 0.07$ | $0.35 \pm 0.1$   |
| 27           | D-Limonene                                  | 1018 | 5989-27-5  | $9.33 \pm 3.16$ | $10.91 \pm 3.86$ |
| 28           | (E)- $\beta$ -Ocimene                       | 976  | 3779-61-1  | $0.6 \pm 0.08$  | $0.46 \pm 0.1$   |
| 29           | (Z)- $\beta$ -Ocimene                       | 976  | 3338-55-4  | $0.9 \pm 0.2$   | $0.82 \pm 0.13$  |
| 30           | $\gamma$ -Limonene                          | 1013 | 499-97-8   | $0.71 \pm 0.08$ | $0.87 \pm 0.24$  |
| 31           | Terpinolene                                 | 1052 | 586-62-9   | $0.39 \pm 0.06$ | $0.69 \pm 0.6$   |
| 32           | 1-Undecene                                  | 1105 | 821-95-4   | $0.3 \pm 0.07$  | -                |
| 33           | (Z)-4-Undecene                              | 1123 | 821-98-7   | $0.45 \pm 0.05$ | -                |
| 34           | Azulene                                     | 1069 | 275-51-4   | -               | $3.65 \pm 0.43$  |
| 35           | Dodecane                                    | 1214 | 112-40-3   | $0.66 \pm 0.19$ | $0.74 \pm 0.15$  |
| 36           | Benzocycloheptatriene                       | 1251 | 264-09-5   | $0.29 \pm 0.04$ | $0.65 \pm 0.08$  |
| 37           | 1-Tetradecene                               | 1403 | 1120-36-1  | -               | $0.19 \pm 0.02$  |
| 38           | Tetradecane                                 | 1413 | 629-59-4   | $0.71 \pm 0.1$  | $1.09 \pm 0.11$  |
| 39           | Cedrene                                     | 1398 | 11028-42-5 | $0.28 \pm 0.03$ | $0.96 \pm 0.09$  |
| 40           | Acenaphthylene                              | 1460 | 208-96-8   | $0.08 \pm 0.01$ | $2.03 \pm 0.24$  |
| 41           | Acenaphthene                                | 1478 | 83-32-9    | $1.81 \pm 0.12$ | -                |
| 42           | Pentadecane                                 | 1512 | 629-62-9   | $0.89 \pm 0.5$  | $0.45 \pm 0.08$  |
| 43           | $\beta$ -Bisabolene                         | 1500 | 495-61-4   | $1.04 \pm 0.29$ | -                |
| 44           | cis,cis-5,9-Tetradecadiene                  | 1429 | 51255-62-0 | $0.46 \pm 0.09$ | $0.56 \pm 0.03$  |

|         |                                                 |      |            |             |             |
|---------|-------------------------------------------------|------|------------|-------------|-------------|
| 45      | Germacrene D                                    | 1515 | 23986-74-5 | 0.38 ± 0.05 | 0.25 ± 0.03 |
| 46      | 1-(o-Ethylphenyl)-1-phenyl-ethane               | 1715 | 18908-70-8 | 0.18 ± 0.02 | 0.31 ± 0.05 |
| 47      | 7-Methyl-heptadecane                            | 1746 | 20959-33-5 | 0.81 ± 0.06 | 0.19 ± 0.03 |
| 48      | Anthracene                                      | 1782 | 120-12-7   | 1.7 ± 0.11  | 0.4 ± 0.06  |
| Ketones |                                                 |      |            |             |             |
| 49      | 2-Methyloctan-3-one                             | 988  | 923-28-4   | -           | 1.21 ± 0.36 |
| 50      | Acetophenone                                    | 1029 | 98-86-2    | 0.13 ± 0.04 | -           |
| 51      | 3,5-Octadien-2-one                              | 968  | 38284-27-4 | -           | 0.85 ± 0.18 |
| 52      | Nona-3,5-dien-2-one                             | 1068 | 80387-31-1 | 0.1 ± 0.03  | 0.55 ± 0.15 |
| 53      | ( <i>R,S</i> )-5-Ethyl-6-methyl-3E-hepten-2-one | 1031 | 57283-79-1 | 0.39 ± 0.02 | 0.35 ± 0.01 |
| 54      | Jasmone                                         | 1338 | 488-10-8   | 2.14 ± 0.18 | 0.91 ± 0.06 |
| 55      | 6,10-Dimethyl-5,9-undecadien-2-one              | 1420 | 689-67-8   | 0.89 ± 0.14 | 0.94 ± 0.02 |
| 56      | ( <i>E</i> )- $\beta$ -Ionone                   | 1457 | 79-77-6    | 0.34 ± 0.02 | 0.54 ± 0.05 |
| 57      | 2-Heptadecanone                                 | 1847 | 2922-51-2  | 0.14 ± 0.01 | 0.08 ± 0.02 |
| 58      | Phytol                                          | 2045 | 150-86-7   | 0.85 ± 0.25 | -           |
| Esters  |                                                 |      |            |             |             |
| 59      | Pentyl acetate                                  | 884  | 628-63-7   | -           | 0.33 ± 0.24 |
| 60      | Ethyl hexanoate                                 | 984  | 123-66-0   | 3.01 ± 0.49 | 0.28 ± 0.1  |
| 61      | cis-3-Hexenyl Acetate                           | 992  | 3681-71-8  | 1.65 ± 0.03 | -           |
| 62      | Hexyl acetate                                   | 984  | 142-92-7   | 0.64 ± 0.4  | 0.99 ± 0.35 |
| 63      | 2-Ethylhexyl acetate                            | 1118 | 103-09-3   | 0.22 ± 0.02 | 0.21 ± 0.03 |
| 64      | ( <i>E</i> )-3-hexen-1-yl butyrate              | 1191 | 53398-84-8 | 1.13 ± 0.13 | 0.72 ± 0.02 |
| 65      | ethyl ( <i>Z</i> )-4-octenoate                  | 1191 | 34495-71-1 | 0.67 ± 0.1  | -           |
| 66      | Methyl salicylate                               | 1281 | 119-36-8   | -           | 0.55 ± 0.02 |
| 67      | Butyl hexanoate                                 | 1183 | 626-82-4   | 1.83 ± 0.25 | -           |
| 68      | <i>trans</i> -2-Hexenyl butyrate                | 1191 | 53398-83-7 | 0.11 ± 0.02 | 0.45 ± 0.07 |

|        |                                                 |      |            |             |             |
|--------|-------------------------------------------------|------|------------|-------------|-------------|
| 69     | Ethyl caprylate                                 | 1183 | 106-32-1   | 4.39 ± 0.82 | -           |
| 70     | 2-Ethylhexyl acrylate                           | 1208 | 103-11-7   | 1.22 ± 0.25 | 1.46 ± 0.13 |
| 71     | <i>cis</i> -3-Hexenyl- $\alpha$ -methylbutyrate | 1226 | 53398-85-9 | 0.21 ± 0.03 | 0.26 ± 0    |
| 72     | Hexyl 2-methylbutyrate                          | 1218 | 10032-15-2 | 0.58 ± 0.09 | 1.2 ± 0.12  |
| 73     | (2-Methyl-5-oxooxolan-2-yl) acetate             | 1226 | 57681-51-3 | 0.04 ± 0.01 | 0.27 ± 0.04 |
| 74     | Ethyl nonylate                                  | 1282 | 123-29-5   | 0.16 ± 0    | -           |
| 75     | Methyl geranate                                 | 1252 | 2349-14-6  | -           | 0.43 ± 0.03 |
| 76     | $\beta$ -Terpinyl acetate                       | 1348 | 10198-23-9 | -           | 0.28 ± 0.01 |
| 77     | ( <i>Z</i> )-3-hexen-1-yl caproate              | 1389 | 31501-11-8 | 1.69 ± 0.17 | 0.53 ± 0.02 |
| 78     | Hexyl hexanoate                                 | 1381 | 6378-65-0  | 0.49 ± 0.06 | 0.65 ± 0.02 |
| 79     | Ethyl caprate                                   | 1381 | 110-38-3   | 0.36 ± 0.09 | -           |
| 80     | 2,2,4-Trimethyl-1,3-pentanediol diisobutyrate   | 1605 | 6846-50-0  | 0.64 ± 0.15 | 0.58 ± 0.06 |
| 81     | Heptafluorobutyric acid hexadecyl ester         | 1733 | 6385-15-5  | 0.18 ± 0.06 | -           |
| 82     | Ethyl tetradecanoate                            | 1779 | 124-06-1   | 0.22 ± 0.05 | -           |
| 83     | Isopropyl myristate                             | 1814 | 110-27-0   | 0.55 ± 0.39 | -           |
| 84     | Monobutyl Phthalate                             | 1828 | 131-70-4   | 0.36 ± 0.09 | -           |
| 85     | Butyl isobutyl phthalate                        | 1973 | 17851-53-5 | 0.52 ± 0.16 | 0.06 ± 0.02 |
| 86     | Ethyl palmitate                                 | 1978 | 628-97-7   | 1.78 ± 0.58 | -           |
| Others |                                                 |      |            |             |             |
| 87     | Phthalan                                        | 1036 | 496-14-0   | 0.39 ± 0.1  | 1 ± 0.04    |
| 88     | Tea pyrrole                                     | 1054 | 2167-14-8  | 0.37 ± 0.01 | -           |
| 89     | Dibenzofuran                                    | 1483 | 132-64-9   | 0.8 ± 0.14  | 0.39 ± 0.07 |
| 90     | Nonanoic acid                                   | 1272 | 112-05-0   | 0.2 ± 0.04  | -           |
| 91     | 9-Hexadecenoic acid                             | 1976 | 2091-29-4  | 0.16 ± 0.07 | -           |

PGT, pan-fired green tea; SGT, steamed green tea.

**Table S2. VIP values in OPLS-DA model and *p* values of volatiles compounds.**

| ID        | Name                         | VIP value    | <i>P</i> value |
|-----------|------------------------------|--------------|----------------|
| <b>9</b>  | <b>Linalool</b>              | <b>5.903</b> | <b>0.001</b>   |
| 27        | D-Limonene                   | 2.870        | 0.679          |
| <b>69</b> | <b>Ethyl caprylate</b>       | <b>2.724</b> | <b>0.002</b>   |
| <b>34</b> | <b>Azulene</b>               | <b>2.274</b> | <b>0.000</b>   |
| <b>16</b> | <b>Geraniol</b>              | <b>2.137</b> | <b>0.009</b>   |
| <b>2</b>  | <b>1-Hexanol</b>             | <b>1.942</b> | <b>0.000</b>   |
| <b>17</b> | <b>Cedrenol</b>              | <b>1.771</b> | <b>0.005</b>   |
| <b>60</b> | <b>Ethyl hexanoate</b>       | <b>1.698</b> | <b>0.013</b>   |
| 24        | Myrcene                      | 1.687        | 0.259          |
| <b>40</b> | <b>Acenaphthylene</b>        | <b>1.217</b> | <b>0.007</b>   |
| <b>14</b> | <b>trans-2-Pinanol</b>       | <b>1.203</b> | <b>0.004</b>   |
| 23        | 1,3,5,7-Cyclooctatetraene    | 1.199        | 0.916          |
| <b>67</b> | <b>Butyl hexanoate</b>       | <b>1.137</b> | <b>0.000</b>   |
| <b>41</b> | <b>Acenaphthene</b>          | <b>1.120</b> | <b>0.002</b>   |
| <b>86</b> | <b>Ethyl palmitate</b>       | <b>1.109</b> | <b>0.049</b>   |
| <b>61</b> | <b>cis-3-Hexenyl Acetate</b> | <b>1.026</b> | <b>0.000</b>   |
| 6         | Myrcenol                     | 0.815        | 0.004          |
| 48        | Anthracene                   | 0.804        | 0.000          |
| 3         | 5-Methyl-2-heptanol          | 0.794        | 0.009          |
| 5         | Benzyl alcohol               | 0.790        | 0.039          |
| 54        | Jasmone                      | 0.763        | 0.001          |
| 49        | 2-Methyloctan-3-one          | 0.759        | 0.041          |
| 10        | Phenylethyl Alcohol          | 0.756        | 0.009          |
| 77        | (Z)-3-hexen-1-yl caproate    | 0.720        | 0.010          |
| 43        | β-Bisabolene                 | 0.646        | 0.036          |
| 8         | (E)-Linalool oxide (furan)   | 0.545        | 0.061          |
| 58        | Phytol                       | 0.530        | 0.040          |
| 51        | 3,5-Octadien-2-one           | 0.526        | 0.002          |
| 39        | Cedrene                      | 0.421        | 0.001          |
| 4         | 1-Octen-3-ol                 | 0.419        | 0.002          |
| 65        | ethyl (Z)-4-octenoate        | 0.414        | 0.001          |
| 72        | Hexyl 2-methylbutyrate       | 0.388        | 0.004          |
| 47        | 7-Methyl-heptadecane         | 0.383        | 0.000          |
| 87        | Phthalan                     | 0.379        | 0.001          |
| 83        | Isopropyl myristate          | 0.350        | 0.183          |
| 13        | 1-Nonanol                    | 0.341        | 0.000          |
| 66        | Methyl salicylate            | 0.338        | 0.001          |
| 42        | Pentadecane                  | 0.293        | 0.338          |
| 85        | Butyl isobutyl phthalate     | 0.287        | 0.052          |
| 52        | Nona-3,5-dien-2-one          | 0.284        | 0.044          |
| 33        | (Z)-4-Undecene               | 0.282        | 0.007          |
| 31        | Terpinolene                  | 0.274        | 0.515          |
| 75        | Methyl geranate              | 0.268        | 0.000          |

|    |                                               |       |       |
|----|-----------------------------------------------|-------|-------|
| 7  | 1-Octanol                                     | 0.260 | 0.018 |
| 62 | Hexyl acetate                                 | 0.258 | 0.411 |
| 64 | (E)-3-hexen-1-yl butyrate                     | 0.255 | 0.010 |
| 89 | Dibenzofuran                                  | 0.254 | 0.020 |
| 59 | Pentyl acetate                                | 0.241 | 0.188 |
| 1  | (Z)-3-Hexen-1-ol                              | 0.239 | 0.309 |
| 38 | Tetradecane                                   | 0.234 | 0.021 |
| 88 | Tea pyrrole                                   | 0.227 | 0.001 |
| 36 | Benzocycloheptatriene                         | 0.227 | 0.005 |
| 79 | Ethyl caprate                                 | 0.224 | 0.028 |
| 84 | Monobutyl Phthalate                           | 0.220 | 0.030 |
| 68 | trans-2-Hexenyl butyrate                      | 0.215 | 0.018 |
| 18 | Benzaldehyde                                  | 0.186 | 0.273 |
| 32 | 1-Undecene                                    | 0.184 | 0.029 |
| 76 | $\beta$ -Terpinyl acetate                     | 0.170 | 0.000 |
| 70 | 2-Ethylhexyl acrylate                         | 0.149 | 0.289 |
| 73 | (2-Methyl-5-oxooxolan-2-yl) acetate           | 0.146 | 0.013 |
| 30 | $\gamma$ -Limonene                            | 0.146 | 0.410 |
| 19 | Nonanal                                       | 0.143 | 0.818 |
| 82 | Ethyl tetradecanoate                          | 0.139 | 0.003 |
| 56 | (E)- $\beta$ -Ionone                          | 0.125 | 0.008 |
| 90 | Nonanoic acid                                 | 0.122 | 0.020 |
| 37 | 1-Tetradecene                                 | 0.115 | 0.000 |
| 81 | Heptafluorobutyric acid hexadecyl ester       | 0.112 | 0.045 |
| 22 | 10-Undecenal                                  | 0.111 | 0.001 |
| 91 | 9-Hexadecenoic acid                           | 0.103 | 0.037 |
| 78 | Hexyl hexanoate                               | 0.099 | 0.026 |
| 74 | Ethyl nonylate                                | 0.097 | 0.000 |
| 28 | (E)- $\beta$ -Ocimene                         | 0.089 | 0.226 |
| 21 | $\beta$ -Cyclocitral                          | 0.087 | 0.030 |
| 46 | 1-(o-Ethylphenyl)-1-phenyl-ethane             | 0.083 | 0.023 |
| 45 | Germacrene D                                  | 0.079 | 0.045 |
| 50 | Acetophenone                                  | 0.078 | 0.047 |
| 26 | o-Cymene                                      | 0.076 | 0.317 |
| 25 | 4-Methyl-3-(1-methylethylidene)-cyclohexene   | 0.073 | 0.889 |
| 44 | cis,cis-5,9-Tetradecadiene                    | 0.068 | 0.201 |
| 11 | (S)-3,7-Dimethyl-1-octanol                    | 0.061 | 0.009 |
| 35 | Dodecane                                      | 0.055 | 0.662 |
| 15 | (Z)-Nerol                                     | 0.053 | 0.023 |
| 29 | (Z)- $\beta$ -Ocimene                         | 0.053 | 0.631 |
| 80 | 2,2,4-Trimethyl-1,3-pentanediol diisobutyrate | 0.048 | 0.599 |
| 55 | 6,10-Dimethyl-5,9-undecadien-2-one            | 0.044 | 0.602 |
| 57 | 2-Heptadecanone                               | 0.038 | 0.018 |
| 71 | cis-3-Hexenyl- $\alpha$ -methylbutyrate       | 0.033 | 0.093 |

|    |                                        |       |       |
|----|----------------------------------------|-------|-------|
| 53 | (R,S)-5-Ethyl-6-methyl-3E-hepten-2-one | 0.026 | 0.063 |
| 20 | Decanal                                | 0.023 | 0.871 |
| 63 | 2-Ethylhexyl acetate                   | 0.006 | 0.820 |
| 12 | (Z)-3-Nonen-1-ol                       | 0.001 | 0.927 |

---



**Table S3. Contents of chemical compounds in PGT and SGT.**

| Compounds     | Contents (mg/g) |               |
|---------------|-----------------|---------------|
|               | PGT             | SGT           |
| ECG           | 27.97 ± 0.27    | 34.77 ± 0.23  |
| EGC           | 11.75 ± 0.16    | 25.41 ± 0.13  |
| C             | 11.18 ± 0.48    | 1.62 ± 0.01   |
| EGCG          | 56.58 ± 0.07    | 72.03 ± 1.97  |
| EC            | 3.86 ± 0.14     | 5.85 ± 0.17   |
| Catechins     | 111.36 ± 0.67   | 139.68 ± 1.68 |
| GA            | 12.23 ± 0.16    | 16.11 ± 0.12  |
| Theophylline  | 5.89 ± 0.1      | 6.15 ± 0.36   |
| Caffeine      | 30.97 ± 0.16    | 32.46 ± 0.78  |
| Theobromine   | 0.88 ± 0.01     | 1.07 ± 0.01   |
| Alkaloids     | 37.74 ± 0.26    | 39.68 ± 1.09  |
| Threonine     | 0.54 ± 0        | 0.62 ± 0.01   |
| Valine        | 0.88 ± 0.05     | 1.38 ± 0.04   |
| Isoleucine    | 0.47 ± 0        | 0.64 ± 0.01   |
| Leucine       | 0.85 ± 0        | 0.82 ± 0.02   |
| Phenylalanine | 0.8 ± 0.01      | 1.44 ± 0.04   |
| Tryptophan    | 0.41 ± 0.01     | 0.51 ± 0.01   |
| Lysine        | 0.61 ± 0.02     | 0.26 ± 0      |
| Aspartate     | 2.84 ± 0.09     | 1.54 ± 0.03   |
| Serine        | 1.05 ± 0.01     | 0.97 ± 0.01   |
| Asparagine    | 1.82 ± 0.02     | 4.9 ± 0.08    |
| Glutamate     | 1.81 ± 0.2      | 3.69 ± 0.07   |
| Alanine       | 0.55 ± 0        | 0.49 ± 0.01   |
| Tyrosine      | 0.46 ± 0        | 0.59 ± 0.02   |
| Arginine      | 4.19 ± 0.15     | 0.98 ± 0.03   |
| Histidine     | 0.66 ± 0        | 0.4 ± 0.02    |
| Theanine      | 23.14 ± 0.79    | 14.4 ± 0.35   |
| GABA          | 0.38 ± 0        | 0.17 ± 0.01   |
| TEAA          | 4.56 ± 0.07     | 5.67 ± 0.12   |
| TNAA          | 13.38 ± 0.43    | 13.56 ± 0.23  |
| TAA           | 41.47 ± 1.25    | 33.79 ± 0.68  |
| Umami AA      | 29.61 ± 1.04    | 24.53 ± 0.49  |
| Sweet AA      | 2.15 ± 0.02     | 2.08 ± 0.03   |
| Bitter AA     | 8.67 ± 0.19     | 6.61 ± 0.16   |
| Astrengent AA | 0.38 ± 0        | 0.17 ± 0.01   |

AAs, amino acids; TEAA, total essential amino acids; TNEAA, total non-essential amino acids;  
TAA, total amino acids.

**Table S4. VIP values in OPLS-DA model and *p* values of chemical compounds.**

| ID  | Compounds                  | VIP value | <i>P</i> value |
|-----|----------------------------|-----------|----------------|
| 74  | Ethyl nonylate             | 1.135     | 0.000          |
| 61  | cis-3-Hexenyl Acetate      | 1.135     | 0.000          |
| 93  | EGC                        | 1.135     | 0.000          |
| 76  | β-Terpinyl acetate         | 1.135     | 0.000          |
| 110 | Asparagine                 | 1.134     | 0.000          |
| 117 | GABA                       | 1.134     | 0.000          |
| 88  | Tea pyrrole                | 1.134     | 0.001          |
| 66  | Methyl salicylate          | 1.133     | 0.001          |
| 2   | 1-Hexanol                  | 1.133     | 0.000          |
| 94  | C                          | 1.133     | 0.001          |
| 92  | ECG                        | 1.133     | 0.000          |
| 97  | GA                         | 1.133     | 0.000          |
| 114 | Arginine                   | 1.132     | 0.000          |
| 105 | Phenylalanine              | 1.132     | 0.000          |
| 107 | Lysine                     | 1.132     | 0.002          |
| 115 | Histidine                  | 1.131     | 0.000          |
| 100 | Theobromine                | 1.130     | 0.000          |
| 108 | Aspartate                  | 1.130     | 0.000          |
| 103 | Isoleucine                 | 1.130     | 0.000          |
| 41  | Acenaphthene               | 1.130     | 0.002          |
| 75  | Methyl geranate            | 1.130     | 0.000          |
| 14  | trans-2-Pinanol            | 1.128     | 0.004          |
| 17  | Cedrenol                   | 1.127     | 0.005          |
| 6   | Myrcenol                   | 1.127     | 0.004          |
| 96  | EC                         | 1.125     | 0.000          |
| 116 | Theanine                   | 1.124     | 0.000          |
| 48  | Anthracene                 | 1.124     | 0.000          |
| 13  | 1-Nonanol                  | 1.123     | 0.000          |
| 111 | Glutamate                  | 1.122     | 0.000          |
| 33  | (Z)-4-Undecene             | 1.122     | 0.007          |
| 102 | Valine                     | 1.122     | 0.000          |
| 47  | 7-Methyl-heptadecane       | 1.121     | 0.000          |
| 40  | Acenaphthylene             | 1.121     | 0.007          |
| 34  | Azulene                    | 1.121     | 0.000          |
| 67  | Butyl hexanoate            | 1.119     | 0.000          |
| 11  | (S)-3,7-Dimethyl-1-octanol | 1.118     | 0.009          |
| 22  | 10-Undecenal               | 1.117     | 0.001          |
| 113 | Tyrosine                   | 1.116     | 0.001          |
| 3   | 5-Methyl-2-heptanol        | 1.116     | 0.009          |
| 95  | EGCG                       | 1.116     | 0.000          |
| 37  | 1-Tetradecene              | 1.116     | 0.000          |
| 77  | (Z)-3-hexen-1-yl caproate  | 1.116     | 0.010          |
| 39  | Cedrene                    | 1.115     | 0.001          |

|     |                                         |       |       |
|-----|-----------------------------------------|-------|-------|
| 65  | ethyl (Z)-4-octenoate                   | 1.115 | 0.001 |
| 9   | Linalool                                | 1.114 | 0.001 |
| 101 | Threonine                               | 1.114 | 0.001 |
| 54  | Jasmone                                 | 1.112 | 0.001 |
| 106 | Tryptophan                              | 1.108 | 0.001 |
| 112 | Alanine                                 | 1.108 | 0.001 |
| 69  | Ethyl caprylate                         | 1.105 | 0.002 |
| 60  | Ethyl hexanoate                         | 1.104 | 0.013 |
| 73  | (2-Methyl-5-oxooxolan-2-yl) acetate     | 1.104 | 0.013 |
| 87  | Phthalan                                | 1.103 | 0.001 |
| 90  | Nonanoic acid                           | 1.101 | 0.020 |
| 51  | 3,5-Octadien-2-one                      | 1.098 | 0.002 |
| 4   | 1-Octen-3-ol                            | 1.097 | 0.002 |
| 82  | Ethyl tetradecanoate                    | 1.094 | 0.003 |
| 68  | trans-2-Hexenyl butyrate                | 1.092 | 0.018 |
| 32  | 1-Undecene                              | 1.087 | 0.029 |
| 84  | Monobutyl Phthalate                     | 1.086 | 0.030 |
| 79  | Ethyl caprate                           | 1.079 | 0.028 |
| 109 | Serine                                  | 1.078 | 0.004 |
| 43  | $\beta$ -Bisabolene                     | 1.077 | 0.036 |
| 72  | Hexyl 2-methylbutyrate                  | 1.073 | 0.004 |
| 36  | Benzocycloheptatriene                   | 1.073 | 0.005 |
| 5   | Benzyl alcohol                          | 1.072 | 0.039 |
| 58  | Phytol                                  | 1.070 | 0.040 |
| 10  | Phenylethyl Alcohol                     | 1.066 | 0.009 |
| 50  | Acetophenone                            | 1.059 | 0.047 |
| 16  | Geraniol                                | 1.056 | 0.009 |
| 81  | Heptafluorobutyric acid hexadecyl ester | 1.054 | 0.045 |
| 64  | (E)-3-hexen-1-yl butyrate               | 1.054 | 0.010 |
| 56  | (E)- $\beta$ -Ionone                    | 1.052 | 0.008 |
| 49  | 2-Methyloctan-3-one                     | 1.051 | 0.041 |
| 7   | 1-Octanol                               | 1.048 | 0.018 |
| 86  | Ethyl palmitate                         | 1.043 | 0.049 |
| 52  | Nona-3,5-dien-2-one                     | 1.040 | 0.044 |
| 85  | Butyl isobutyl phthalate                | 1.040 | 0.052 |
| 57  | 2-Heptadecanone                         | 1.019 | 0.018 |
| 38  | Tetradecane                             | 0.998 | 0.021 |
| 89  | Dibenzofuran                            | 0.998 | 0.020 |
| 15  | (Z)-Nerol                               | 0.998 | 0.023 |
| 46  | 1-(o-Ethylphenyl)-1-phenyl-ethane       | 0.995 | 0.023 |
| 78  | Hexyl hexanoate                         | 0.991 | 0.026 |
| 91  | 9-Hexadecenoic acid                     | 0.980 | 0.037 |
| 104 | Leucine                                 | 0.978 | 0.033 |
| 21  | $\beta$ -Cyclocitral                    | 0.974 | 0.030 |
| 45  | Germacrene D                            | 0.936 | 0.045 |
| 8   | (E)-Linalool oxide (furan)              | 0.924 | 0.061 |

|    |                                               |       |       |
|----|-----------------------------------------------|-------|-------|
| 99 | Caffeine                                      | 0.909 | 0.057 |
| 53 | (R,S)-5-Ethyl-6-methyl-3E-hepten-2-one        | 0.905 | 0.063 |
| 71 | cis-3-Hexenyl- $\alpha$ -methylbutyrate       | 0.903 | 0.093 |
| 59 | Pentyl acetate                                | 0.883 | 0.188 |
| 83 | Isopropyl myristate                           | 0.830 | 0.183 |
| 24 | Myrcene                                       | 0.741 | 0.259 |
| 44 | cis,cis-5,9-Tetradecadiene                    | 0.734 | 0.201 |
| 42 | Pentadecane                                   | 0.729 | 0.338 |
| 26 | o-Cymene                                      | 0.723 | 0.317 |
| 18 | Benzaldehyde                                  | 0.696 | 0.273 |
| 62 | Hexyl acetate                                 | 0.693 | 0.411 |
| 28 | (E)- $\beta$ -Ocimene                         | 0.676 | 0.226 |
| 27 | D-Limonene                                    | 0.665 | 0.679 |
| 98 | Theophylline                                  | 0.630 | 0.377 |
| 1  | (Z)-3-Hexen-1-ol                              | 0.619 | 0.309 |
| 70 | 2-Ethylhexyl acrylate                         | 0.604 | 0.289 |
| 55 | 6,10-Dimethyl-5,9-undecadien-2-one            | 0.588 | 0.602 |
| 30 | $\gamma$ -Limonene                            | 0.577 | 0.410 |
| 31 | Terpinolene                                   | 0.564 | 0.515 |
| 20 | Decanal                                       | 0.452 | 0.871 |
| 23 | 1,3,5,7-Cyclooctatetraene                     | 0.441 | 0.916 |
| 29 | (Z)- $\beta$ -Ocimene                         | 0.374 | 0.631 |
| 80 | 2,2,4-Trimethyl-1,3-pentanediol diisobutyrate | 0.324 | 0.599 |
| 19 | Nonanal                                       | 0.299 | 0.818 |
| 35 | Dodecane                                      | 0.269 | 0.662 |
| 12 | (Z)-3-Nonen-1-ol                              | 0.167 | 0.927 |
| 63 | 2-Ethylhexyl acetate                          | 0.138 | 0.820 |
| 25 | 4-Methyl-3-(1-methylethylidene)-cyclohexene   | 0.118 | 0.889 |

---
